# Supplementary material for: Synthesis of monodispersed YbF3:Er3+ nanoplates with rhombus shapes
Source: Royal Society of Chemistry journal article supplement (doi:10.1039/c4ra13271h), 2015-01-01

## Supplementary Information

### Synthesis of Monodispersed $\text{YbF}_3:\text{Er}^{3+}$ Nanoplates with Rhombus Shape

Shengtai He,\* Xiaoqin Hou, Jun Zhou, Yanan Li and Qing Li

*School of Materials Science and Engineering, Tianjin Polytechnic University, Tianjin 300387, China*

\* E-mail: [sht-he@tjpu.edu.cn](mailto:sht-he@tjpu.edu.cn)

#### S1. Chemicals and Characterization

Ytterbium oxide ( $\geq 99.99\%$ ), erbium oxide, ( $\geq 99.99\%$ ), trifluoroacetic acid (TFA;  $\geq 99\%$ ), oleic acid (OA; 90%) and 1-octadecene (ODE; 90%) are used directly without further purification. Those chemicals are purchased from Sigma-aldrich or J&K Chemical Reagent Company.

The size and morphologies of the resulting nanocrystals were determined by a JEOL-2100F transmission electronic microscope (TEM) operating at 200kV. All the measurements were performed on the original aliquots without any size sorting.

#### S2. Nanocrystal synthesis

##### 1) Synthesis of precursor.

The trifluoroacetate precursors were synthesized from ytterbium oxide, erbium oxide and TFA. The corresponding proportion of the three chemicals were added into a four-necked flask (100mL) containing 10mL H<sub>2</sub>O with continuous stirring. When the temperature reached 80°C, 2.5mL TFA was injected quickly and then the solution was kept refluxing so as to form an optically transparent solution. The solution was dried in an oven at 80°C for 24h to obtain trifluoroacetate precursors.

## **2) Synthesis of YbF<sub>3</sub>: Er<sup>3+</sup> nanocrystals.**

To obtain YbF<sub>3</sub>: Er<sup>3+</sup> nanocrystals, 3.2mLOA and 20mLODE were added in the four-necked flask (100mL) containing trifluoroacetate precursors which have already dried. Then the solution was heated to 80~100°C until the precursors dissolved completely. Then the solution was kept for about 15 minutes to remove water and oxygen with vigorous magnetic stirring under vacuum at 100°C. After that, the solution was bubbled under an inert Ar atmosphere for 30 minutes. The solution was then heated to 280°C, kept for 3h under Ar and kept refluxing. On cooling to room temperature, the nanocrystals were precipitated by adding an excess amount of ethanol into the reacted solution. The final products were collected by the means of centrifugation, washed with ethanol and trichloromethane for three times, and then dispersed in trichloromethane.

### S3. Length and width Histogram of YbF<sub>3</sub>:10%Er<sup>3+</sup> nanoplates

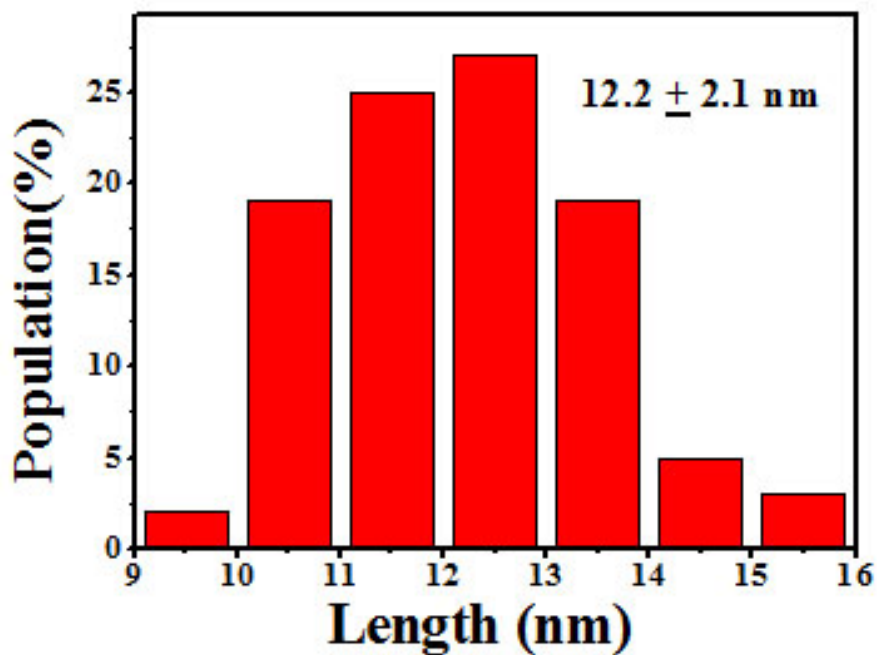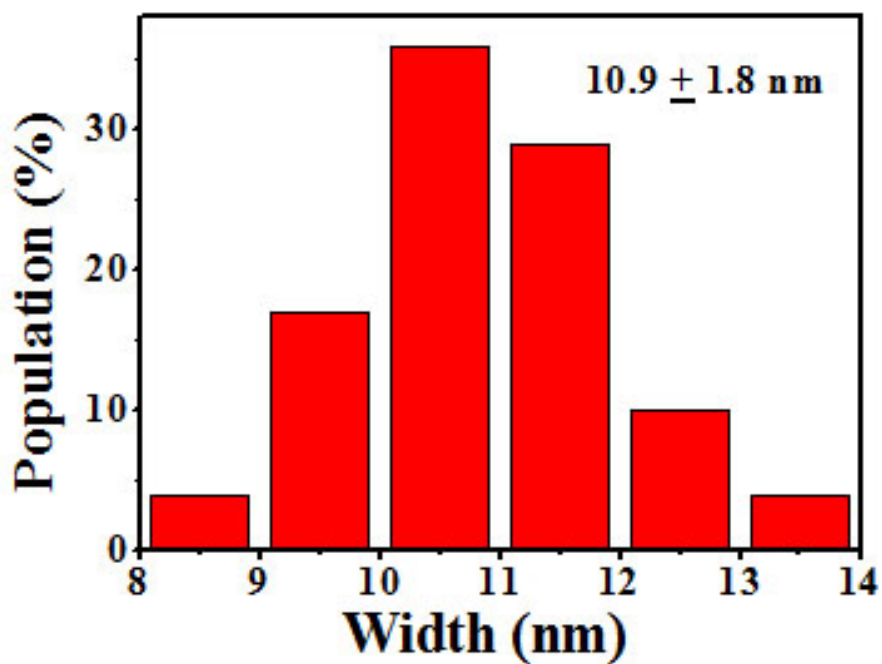

S4. XRD pattern of  $\text{YbF}_3:10\%\text{Er}^{3+}$  nanoplates

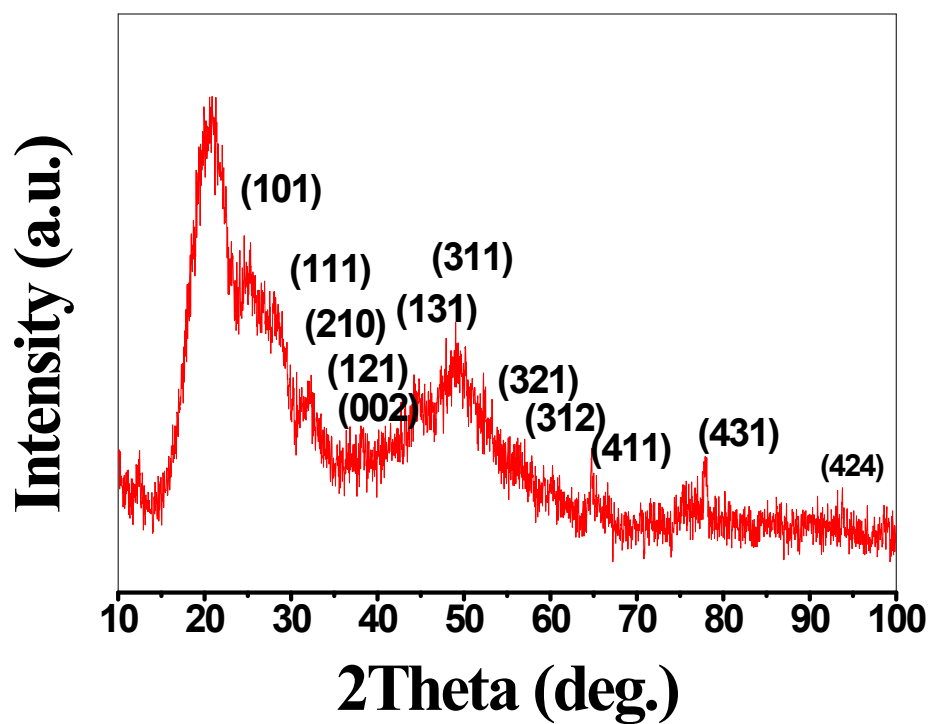

S5. Diffraction pattern of  $\text{YbF}_3:10\%\text{Er}^{3+}$

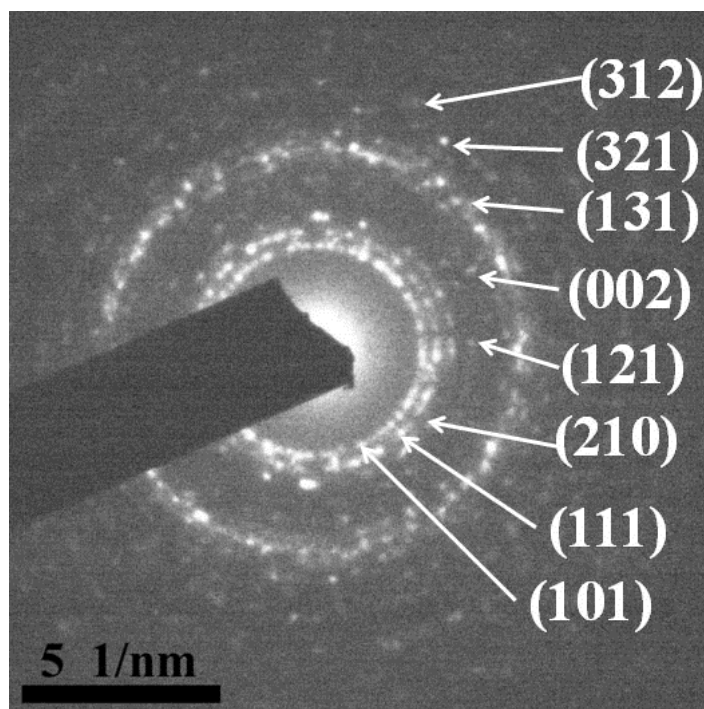

**S6. Diffraction pattern of YbF<sub>3</sub>:50%Er<sup>3+</sup>**

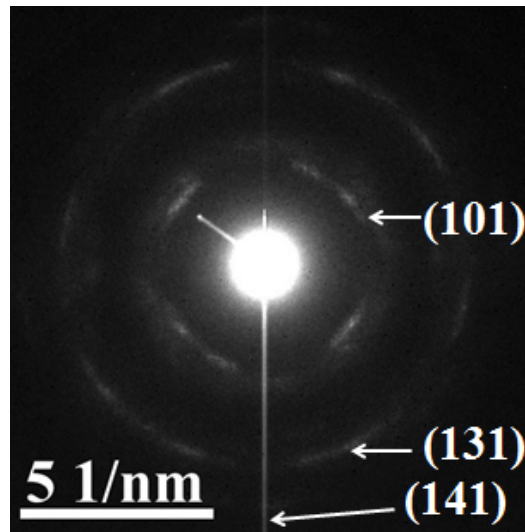

**S7. EDX pattern and elemental quantification of YbF<sub>3</sub>:10%Er<sup>3+</sup> nanoplates**

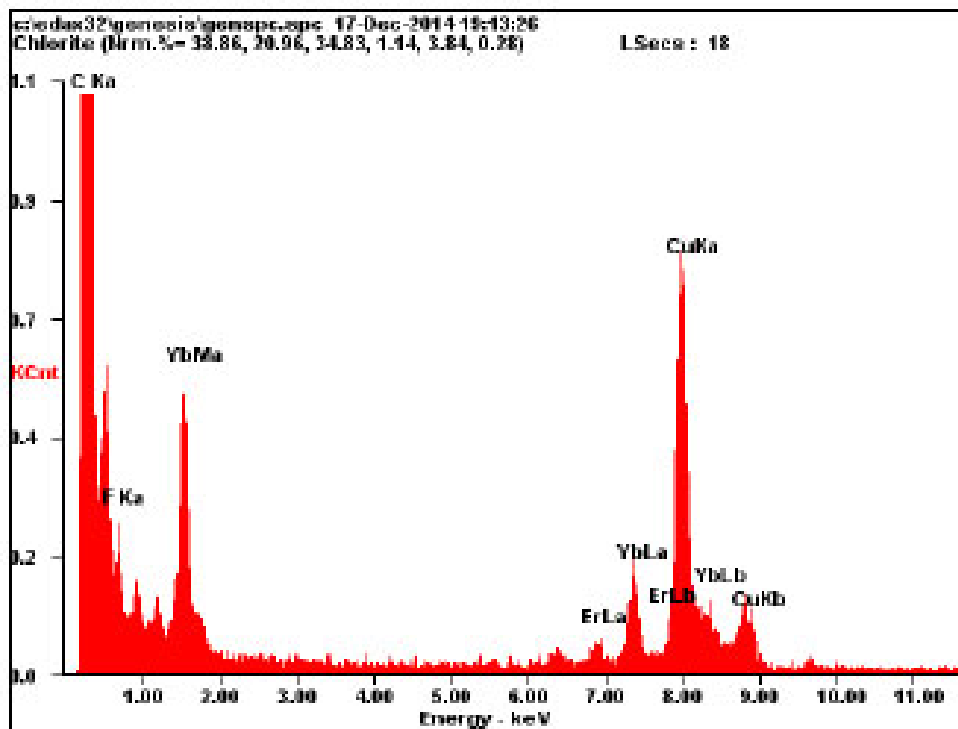

| Element | Wt %   | At %   | K-Ratio | Z      | A      | F      |
|---------|--------|--------|---------|--------|--------|--------|
| ErL     | 24.68  | 25.32  | 0.2316  | 1.0001 | 0.9382 | 1.0000 |
| YbL     | 75.32  | 74.68  | 0.7685  | 1.0000 | 1.0204 | 1.0000 |
| Total   | 100.00 | 100.00 |         |        |        |        |

**S8. EDX pattern and elemental quantification of YbF<sub>3</sub>:50%Er<sup>3+</sup> nanoplates**

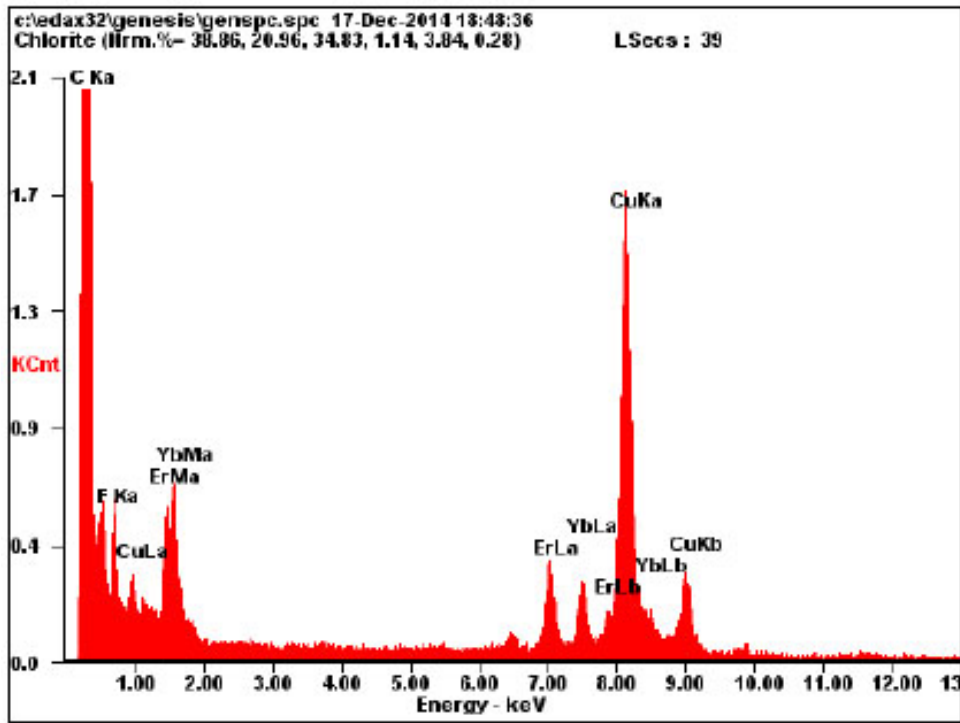

| <i>Element</i> | <i>Wt %</i> | <i>At %</i> | <i>K-Ratio</i> | <i>Z</i> | <i>A</i> | <i>F</i> |
|----------------|-------------|-------------|----------------|----------|----------|----------|
| <i>ErL</i>     | 58.00       | 58.83       | 0.5595         | 1.0001   | 0.9645   | 1.0000   |
| <i>YbL</i>     | 42.00       | 41.17       | 0.4406         | 0.9999   | 1.0492   | 1.0000   |
| Total          | 100.00      | 100.00      |                |          |          |          |

### S9. TEM image of $\text{ErF}_3: 10\% \text{Pr}^{3+}$ nanoplates

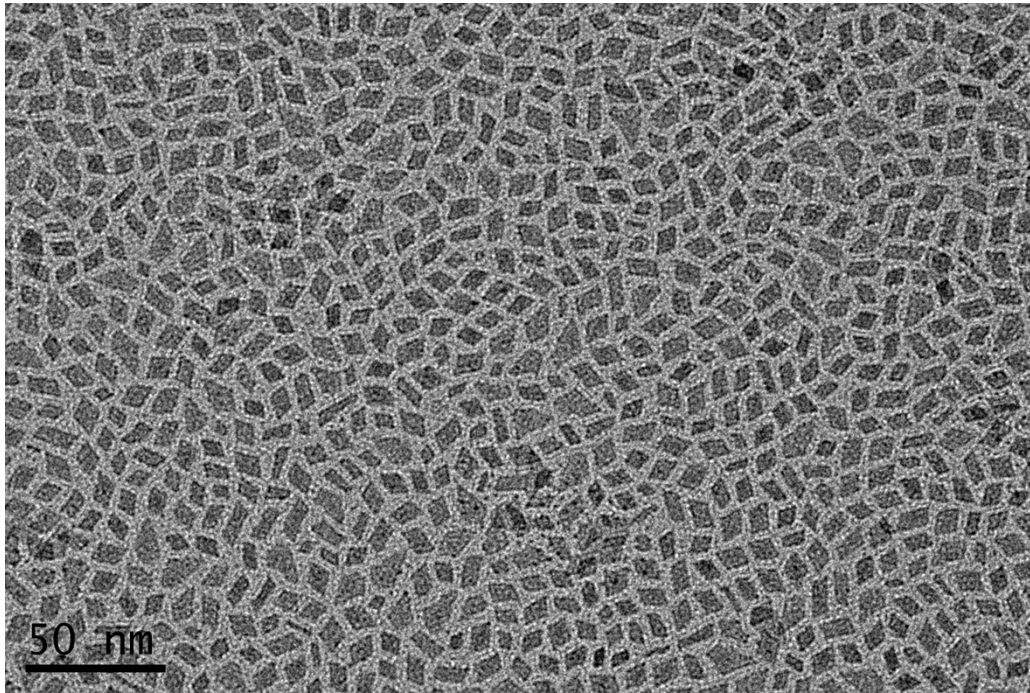

### S10. Energy level diagrams of $\text{Er}^{3+}$ and $\text{Yb}^{3+}$ ions

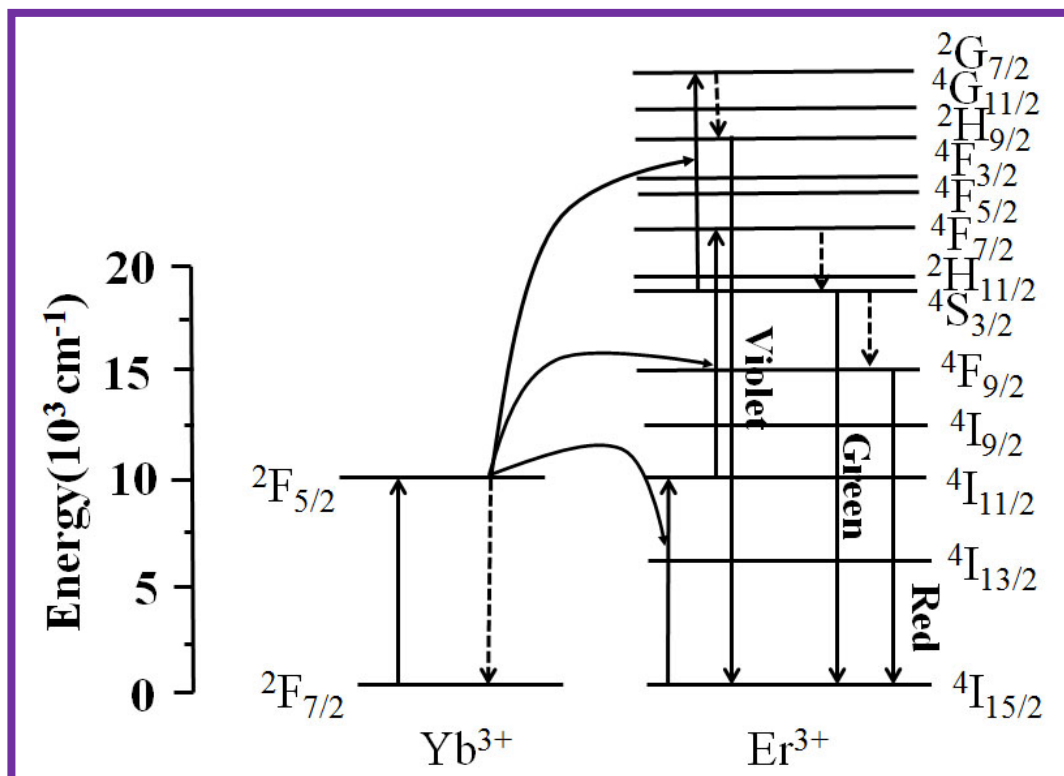

Supplement: c4ra13271h1.pdf [file c4ra13271h1.pdf]
